# Supplementary material for: Antiphase dynamics between cold-based glaciers in the Antarctic Dry Valleys region and ice extent in the Ross Sea during MIS 5
Source: Copernicus journal article supplement (doi:10.5194/tc-2022-252), 2023-01-31
Supplement: Supplementary file 1 [file Table S1.xlsx]

## Sheet: Sheet1
Sample name	Batch number	Quartz Mass	9Be carrier	9Be carrier	9Be	ICP-Al	10Be/9Be	Err	10Be/9Be	Err	10Be	Err	26Al/27Al	Err	26Al/27Al	Err	26Al	Err	Note
	Oz#		conc.	solution			normalised		blk-corrected				normalised		blk-corrected
		(g)	(ug/g)	(g)	(ug)	(ug/gQz)					(at/g)						(at/g)
Pearse Valley (erratics)
PV14-CS3-P1	6748	2.268	1067.5	0.29384	313.674	749.925	1.36e-13	3.959e-15	1.34074e-13	3.97718e-15	1.23908e+06	38788.5	4.57454e-13	2.29517e-14	4.21868e-13	2.84271e-14	7.6571e+06	447617	Al carrier was added.
PV14-CS3-P2	6749	10.002	1067.5	0.29532	315.254	192.194	2.562e-13	6.665e-15	2.54274e-13	6.67581e-15	535544	15045.8	8.85494e-13	2.43182e-14	8.49908e-13	2.95414e-14	3.79861e+06	154497
PV14-CS4-P1	6750	10.298	1067.5	0.29547	315.414	1475.22	2.921e-13	7.28e-15	2.90174e-13	7.2899e-15	593891	16058.6	1.02384e-13	1.53184e-14	6.6798e-14	2.2715e-14	3.37123e+06	514432
Pearse Valley (profile)
PV14-SS-5	7662	10.043	1048.3	0.30367	318.337	1767.91	2.0148e-12	3.98058e-14	2.0021e-12	3.98869e-14	4.24063e+06	94529.4	8.3812e-12	2.12067e-13	8.37989e-12	2.12068e-13	3.30672e+08	1.29783e+07
PV14-A-01	7663	10.11	1048.3	0.30403	318.715	110.003	2.0877e-12	4.11268e-14	2.075e-12	4.12052e-14	4.37108e+06	97185.2	7.602e-12	1.9301e-13	7.60069e-12	1.93011e-13	1.8662e+07	733502
PV14-A-02	7664	10.126	1048.3	0.30389	318.568	104.125	2.0813e-12	4.09059e-14	2.0686e-12	4.09847e-14	4.34871e+06	96512.5	7.7322e-12	1.96154e-13	7.73089e-12	1.96155e-13	1.79673e+07	705952
PV14-A-03	7665	10.104	1048.3	0.30362	318.285	101.664	2.1134e-12	4.16817e-14	2.1007e-12	4.17591e-14	4.42188e+06	98396.4	8.6497e-12	2.51293e-13	8.64839e-12	2.51294e-13	1.96246e+07	819615
PV14-A-04	7666	10.021	1048.3	0.30095	315.486	104.538	No beam						8.546e-12	2.17009e-13	8.54469e-12	2.1701e-13	1.99374e+07	783673
PV14-A-05	8965	10.14	1048.3	0.30471	319.427	98.6014	2.1025e-12	4.13874e-14	2.0898e-12	4.14653e-14	4.39905e+06	97743.5	8.306e-12	1.89042e-13	8.30469e-12	1.89043e-13	1.8277e+07	688288
PV14-A-07	8966	10.406	1048.3	0.30199	316.576	104.016	1.9617e-12	3.88873e-14	1.949e-12	3.89702e-14	3.96211e+06	88577.6	7.7313e-12	1.95956e-13	7.72999e-12	1.95957e-13	1.79465e+07	704873
PV14-A-10	7667	10.34	1048.3	0.30405	318.736	101.565	No beam						7.2244e-12	1.83589e-13	7.22309e-12	1.8359e-13	1.63744e+07	643835
PV14-A-15	7668	10.282	1048.3	0.30425	318.945	89.6435	1.8475e-12	3.66435e-14	1.8348e-12	3.67314e-14	3.80319e+06	85107.4	7.5396e-12	1.91194e-13	7.53829e-12	1.91195e-13	1.50831e+07	592535
PV14-A-20	7669	10.383	1048.3	0.30455	319.26	115.079	1.949e-12	3.37859e-14	1.9363e-12	3.38813e-14	3.97845e+06	80181.2	6.8136e-12	1.55212e-13	6.81229e-12	1.55213e-13	1.7498e+07	659171
PV14-A-25	8967	10.104	1048.3	0.30301	317.645	86.4792	1.8472e-12	3.64883e-14	1.8345e-12	3.65766e-14	3.85378e+06	85960.1	8.6498e-12	2.19346e-13	8.64849e-12	2.19347e-13	1.66936e+07	655797
PV14-A-30	8968	10.12	1048.3	0.30371	318.379	102.09	Be lost in chem						7.3543e-12	1.86732e-13	7.35299e-12	1.86733e-13	1.67551e+07	658570
Lower Wright Valley (profile)
WV14-SS-01	8998	10.547	1048.3	0.30059	315.108	102.221	2.0663e-12	4.10513e-14	2.0536e-12	4.11299e-14	4.09984e+06	91778.6	1.0031e-11	2.54088e-13	1.00297e-11	2.54089e-13	2.28838e+07	898548
WV14-I-01	8969	10.157	1048.3	0.30342	318.075	118.628	1.7956e-12	8.18042e-14	1.7829e-12	8.18436e-14	3.73088e+06	175282	7.189e-12	1.82677e-13	7.18769e-12	1.82679e-13	1.90316e+07	748294
WV14-I-02	8970	10.184	1048.3	0.30283	317.457	117.948	1.8968e-12	3.75572e-14	1.8841e-12	3.7643e-14	3.92455e+06	87683	7.0013e-12	1.7772e-13	6.99999e-12	1.77721e-13	1.84283e+07	724257
WV14-I-03	8971	10.079	1048.3	0.30439	319.092	100.542	1.9045e-12	3.76927e-14	1.8918e-12	3.77782e-14	4.00216e+06	89381.5	9.0822e-12	2.06619e-13	9.08089e-12	2.0662e-13	2.03786e+07	767306
WV14-I-04	8972	10.195	1048.3	0.3028	317.425	103.69	Be lost in chem						9.817e-12	2.48818e-13	9.81569e-12	2.48819e-13	2.27173e+07	892238
WV14-I-05	8973	10.025	1048.3	0.30204	316.629	94.1149	No beam						1.0313e-11	2.61277e-13	1.03117e-11	2.61278e-13	2.16614e+07	850612
WV14-I-07	8974	10.033	1048.3	0.30283	317.457	116.74	Be lost in chem						7.6723e-12	1.94832e-13	7.67099e-12	1.94833e-13	1.99881e+07	785686
WV14-I-10	8975	10.071	1048.3	0.3022	316.796	99.3586	1.9572e-12	3.86978e-14	1.9445e-12	3.87811e-14	4.08729e+06	91189.9	9.2611e-12	2.35038e-13	9.25979e-12	2.35038e-13	2.05355e+07	806990
WV14-I-14	8976	10.033	1048.3	0.30257	317.184	164.648	Be lost in chem						5.611e-12	1.4238e-13	5.60969e-12	1.42381e-13	2.06154e+07	810114
WV14-I-20	8977	10.044	1048.3	0.30244	317.048	93.7102	2.0112e-12	3.97045e-14	1.9985e-12	3.97858e-14	4.21544e+06	93912.5	1.0424e-11	2.64408e-13	1.04227e-11	2.64409e-13	2.18004e+07	856501
WV14-I-23	8978	8.404	1048.3	0.30168	316.251	128.111	Be lost in chem						7.4889e-12	1.90273e-13	7.48759e-12	1.90274e-13	2.14105e+07	841778
WV14-I-29	8979	10.888	1048.3	0.30324	317.886	133.631	No beam						4.5588e-12	1.15745e-13	4.55749e-12	1.15747e-13	1.35935e+07	534315
Measured 10Be/9Be ratios were normalised against KN5-2 Be standard with nominal ratio of 8560 e-15 (Nishiizumi et al. 2007).
Measured 26Al/27Al ratios were normalised against KN4-2 Al standard with nominal ratio of 30960 e-15 (Nishiizumi 2004).
Procedural 10Be/9Be blanks prepared from Be carrier used for samples indicated 1.9 e-15 and 1.3 e-14, and are ≤1% of the measured ratios for the samples.
Procedural 26Al/27Al blanks prepared from Al ICP standard used in a sample (PV14-CS3-P1) indicated 3.6 e-14 and 1.3 e-15, and are typically <1% of the measured ratios for the samples, except CS3-P1 (8%), CS3-P2 (4%) and CS4-P1 (35%). Al blanks were not corrected for in the final 26Al concentration.
Final errors for 10Be and 26Al concentrations include in quadrature the AMS analytical errors (counting statistics, standard reproducibility, error in standard material ratios) and 1% error in Be spike concentration for 10Be, and 3% error in ICP Al concentration for 26Al, respectively.
