# Supplementary material for: Antiphase dynamics between cold-based glaciers in the Antarctic Dry Valleys region and ice extent in the Ross Sea during MIS 5
Source: Copernicus journal article supplement (doi:10.5194/tc-2022-252), 2023-01-31
Supplement: Supplementary file 2 [file tc-2022-252-supplement.zip]

Archive with 2 entries (2 files):
- Anderson et al - Supplementary/Anderson et al Supplementary Data.pdf
- Anderson et al - Supplementary/Table S1.xlsx
